# Supplementary material
Source: PubMed Central journal article supplement (PMC8569417)
Supplement: bloodBLD2021011682-suppl1.pdf [file bloodBLD2021011682-suppl1.pdf]

## Supplemental Figure Legends

### Supplemental Figure 1: Characterization of Inhibitor Effects on Human CD34+ HSPC-induced Erythroid Differentiation.

(A) LSD1 inhibition by a novel, reversible LSD1 inhibitor, CCG50 (LSDi). (B) Schematic summarizing the timing and duration of media supplements (hydrocortisone, IL3, SCF and EPO) to *in vitro* erythroid differentiation of human CD34+ HSPCs. Hydrocortisone and human IL-3 were withdrawn on day 7 when the LSD1 inhibitor(s) were added; human SCF was withdrawn from the culture medium on day 11. (C) Representative flow cytometric cell count of CD34+ HSPCs after 7 days of induced erythroid differentiation (prior to LSD1 inhibitor treatment) analyzed using anti-CD71 and anti-CD235a erythroid antibodies.

**Supplemental Figure 2: Mouse *Gata1* BAC recombination strategy.** A creER<sup>T2</sup>-PolyA-Neo cassette<sup>25,31</sup> was targeted to the ATG start codon in exon 2 of a 196 kb wild type mouse *Gata1* BAC (*G1B*). Subsequently, the Neo selection cassette was removed from the recombinant *G1BCreER<sup>T2</sup>-Neo* BAC to generate the final *G1BCreER<sup>T2</sup>* BAC, which was used to generate transgenic mice.

**Supplemental Figure 3: *G1BCreERT2* is not active in non-erythroid hematopoietic lineages.** Tandem tomato (TdT) epifluorescence was not detectable in BM cells stained with B220+, Gr1+, CD11b+ or CD3ε+ antibodies in either *G1BCreER<sup>T2</sup>* lines L245 or L259 treated with Tamoxifen (red peak). R26T:*G1BCreER<sup>T2</sup>* mice that were not treated with Tx served as negative controls (blue peak).

**Supplemental Figure 4: *G1BCreER<sup>T2</sup>* is expressed in a minor fraction of megakaryocytes and mast cells.** Representative flow cytometric diagrams depicting the gating cutoffs for megakaryocytic progenitor cells (MkPs; Lin-cKit+Sca1-CD41+CD150+; A, B), megakaryocytes (Mk; CD61+CD41+; C, D) or mast cells (FceRIa+c-Kit+; E, F) in the BM of untreated (left panels in A, C and E; blue peaks in B, D and F) or Tx-treated (right panels in A, C and E; red peaks in B, D and F) R26T:*G1BCreER<sup>T2</sup>* L259 mice. Representative flow histograms depict TdT (red peaks) in very few MkPs (B), but in more Mk (D) and mast cells (F).

**Supplemental Figure 5: Gating strategies for CFU-E and megakaryocytic progenitor cell populations.** Total BM cells from untreated (left panels) or Tx-treated (right panels) R26T:*G1BCreER*<sup>T2</sup> L259 mice were stained with the indicated lineage antibodies. Representative flow diagrams depicting the gates used to identify CFU-E (Lin-cKit+Sca1-CD41-CD16/32-CD150-CD105+) and megakaryocytic progenitors (MkPs; Lin-cKit+Sca1-CD41+CD150+), which were analyzed for TdT epifluorescence in Fig.s 2C and S4, respectively.

**Supplemental Figure 6: Gating strategies for LSK, CMP, GMP and MEP populations.** Total BM cells from untreated (left panels) or Tx-treated (right panels) R26T:*G1BCreER*<sup>T2</sup> L259 mice were stained with Lineage, c-Kit, Sca1, CD34 or CD16/32 antibodies. Representative flow plots and labels depict the gates used for LSK (Lin-c-Kit+Sca1+), CMP (Lin-c-Kit+Sca1-CD16/32-CD34+), GMP (Lin-c-Kit+Sca1-CD16/32+CD34+) and MEP (Lin-c-Kit+Sca1-CD16/32-CD34-) populations, which were further analyzed for TdT epifluorescence in Fig. 2C.

**Supplemental Figure 7: Gating strategies for CMP, GMP and MEP populations.** The CD41-CD16/32- LK fraction was separated by CD105 and CD150 for CFU-E staining as shown in Figure 3. The LK fraction was separated by CD34 and CD16/32 for CMP, GMP and MEP staining in Figure 4.

**Supplemental Figure 8: CFU-E cell death is comparable in *Lsd1*-CKO and control mice.** The cell death of CFU-E cells in Figure 3D was analyzed by AnnexinV staining.

**Supplemental Figure 9: Erythroid precursor cells in *Lsd1*-CKO mice exhibit reduced cell death.** The apoptotic cell death of BasoE, PolyE and OrthoE in Fig. 3F was assessed by AnnexinV staining. Data are shown as the means  $\pm$  SD. (\*\*  $p < 0.01$ ; unpaired Student's t-test).

**Supplemental Figure 10: The cell cycle status of erythroid precursors in *Lsd1*-CKO and control mice is statistically unchanged.** The distribution of CD71+Ter119+ cells depicted in Figure 3F was analyzed by DAPI staining. Data is shown as the mean  $\pm$  SD. (\*\*

$p < 0.01$ ; unpaired Student's t-test). 2N, cells in G1 phase; S, cells in S phase; 4N, cells in G2/M phase of the cell cycle.

**Supplemental Figure 11: GMP in *Lsd1*-CKO mice exhibit significantly diminished cell death.** Cell death in phenotypic GMP (shown in Fig. 4A) was analyzed by AnnexinV staining. Data are shown as the means  $\pm$  SD. (\*\*  $p < 0.01$ ; unpaired Student's t-test).

**Supplemental Figure 12: LSD1 directly inhibits myeloid differentiation genes in erythroid cells.** (A) Histograms depicting the relative mRNA levels of human PU.1, CEBP $\alpha$ , RUNX1 and GATA1 (normalized to OAZ1 transcript level<sup>15</sup>) in human CD34+ cells after 14 days of erythroid differentiation as assayed by qRT-PCR. Cells were expanded in the presence of DMSO or LSD1 inhibitors TCP (3  $\mu$ M) or LSD1i at three different concentrations. (B) ChIP-qPCR analysis of LSD1 binding to the *PU.1* promoter in HUDEP2 cells. Differential enrichment was detected at the *PU.1* transcriptional start site (TSS, black bar), but not at an adjacent site (TSS +27kb) included as a negative control (gray bar). Rabbit IgG was included as a negative antibody control. Data are shown as the means  $\pm$  SD. (\*  $p < 0.05$ ; \*\*  $p < 0.01$ ; \*\*\*  $p < 0.001$ ; unpaired Student's t-test).

**Supplemental Figure 13: Sanger sequencing data of *PU.1* -/- HUDEP2 clones.** Individual HUDEP2 clones were subjected to genomic DNA extraction, the genomic DNA locus of sgRNA cutting sites were amplified by PCR, the amplicons were subcloned into a sequencing vector and the sanger chromatogram showing data surrounding the guide cutting sites are shown. Note, clone P2-25 has two PCR products of different sizes; clone P3-14 and P3-18 have only one PCR product; while clone P2-4 has no PCR product.

**Supplemental Figure 14: Sanger sequencing data of *RUNX1* -/- clones.** Individual clones were subjected to genomic DNA extraction, the genomic DNA bearing sgRNA cutting sites was amplified by PCR, the amplicons were subcloned into sequencing vectors and the sanger chromatogram data surrounding the cutting sites is shown.

**Supplemental Figure 15. *PU.1* or *RUNX1* genetic loss rescues HUDEP2 cells from the differentiation inhibition caused by LSD1 inhibitor treatment.** CD71/CD235a flow

cytometric analysis of three different non-specific sgRNA-infected cells (NT1, NT3 and NT4, left), four *PU.1*<sup>-/-</sup> clones (middle panels) or four *RUNX1*<sup>-/-</sup> clones (right panels) treated with **(A)** DMSO or **(B)** 300 nM CCG50 LSD1i for four days after the induction of erythroid differentiation.

**Supplemental Figure 16. RUNX1 inhibitor co-treatment partially rescues the differentiation toxicity of LSD1 inhibitor CCG50. (A)** Human CD34<sup>+</sup> HSPC were expanded for 7 days; on day7, cells were reseeded and treated with LSD1 inhibitor CCG50 or RUNX1 inhibitors (Ro5 or A-10-104) or both inhibitors. **(B)** CD71/CD235a staining of differentiating human CD34<sup>+</sup> cells at day 9, 2 days after the addition of CCG50, RUNX1 inhibitor Ro5-3335, RUNX1 inhibitor AI-10-104 (A104) or both LSD1 and RUNX1 inhibitors.

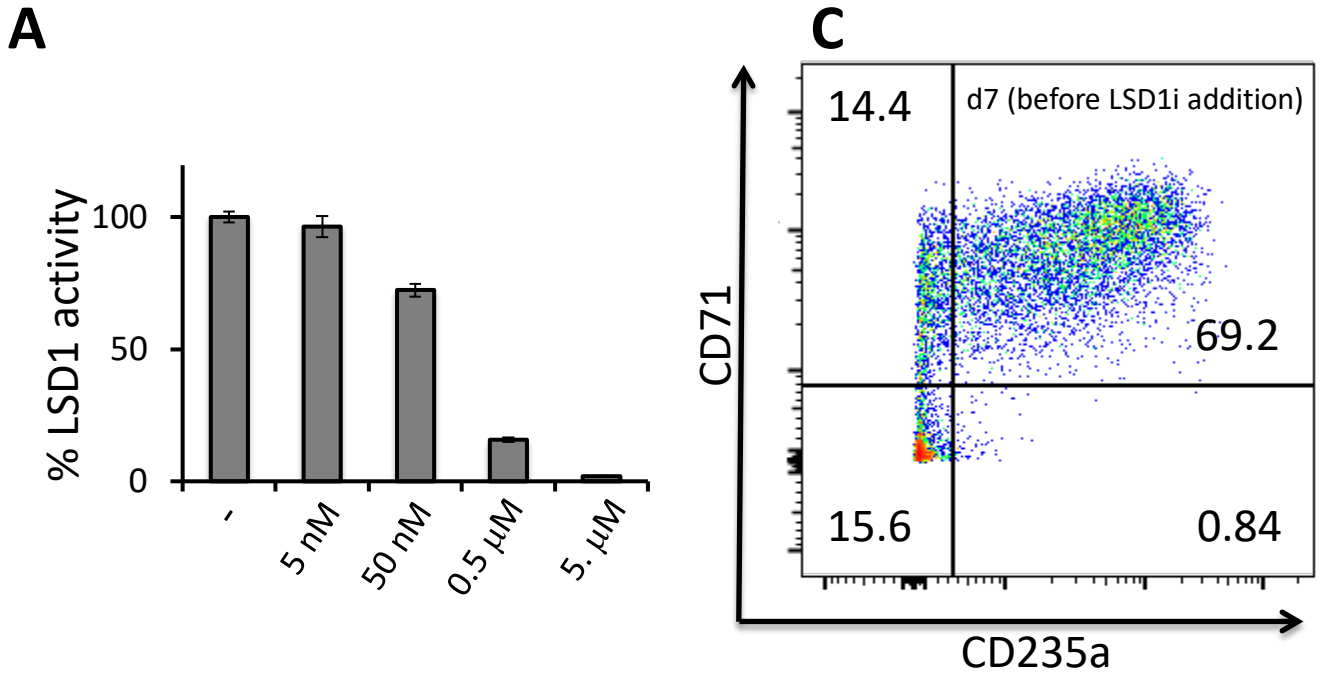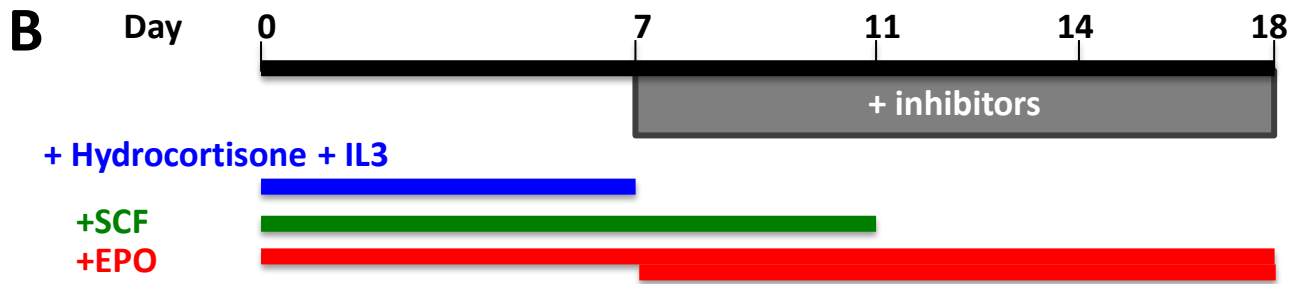

|                |    |     |     |     |
|----------------|----|-----|-----|-----|
| Flow Cytometry | D7 | D11 | D14 | D18 |
| RNA collection |    |     | D14 |     |
| HPLC Analysis  |    |     |     | D18 |

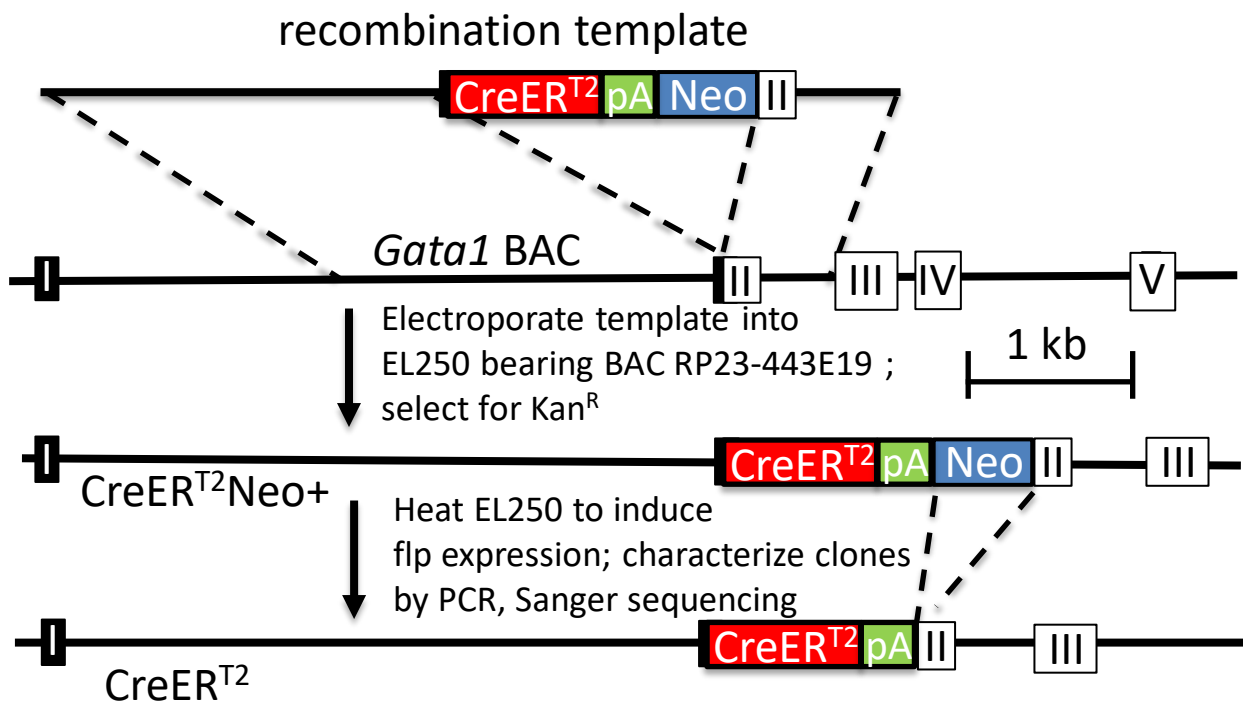

Supplemental Figure 2.

B220/Gr1/CD3e/CD11b+

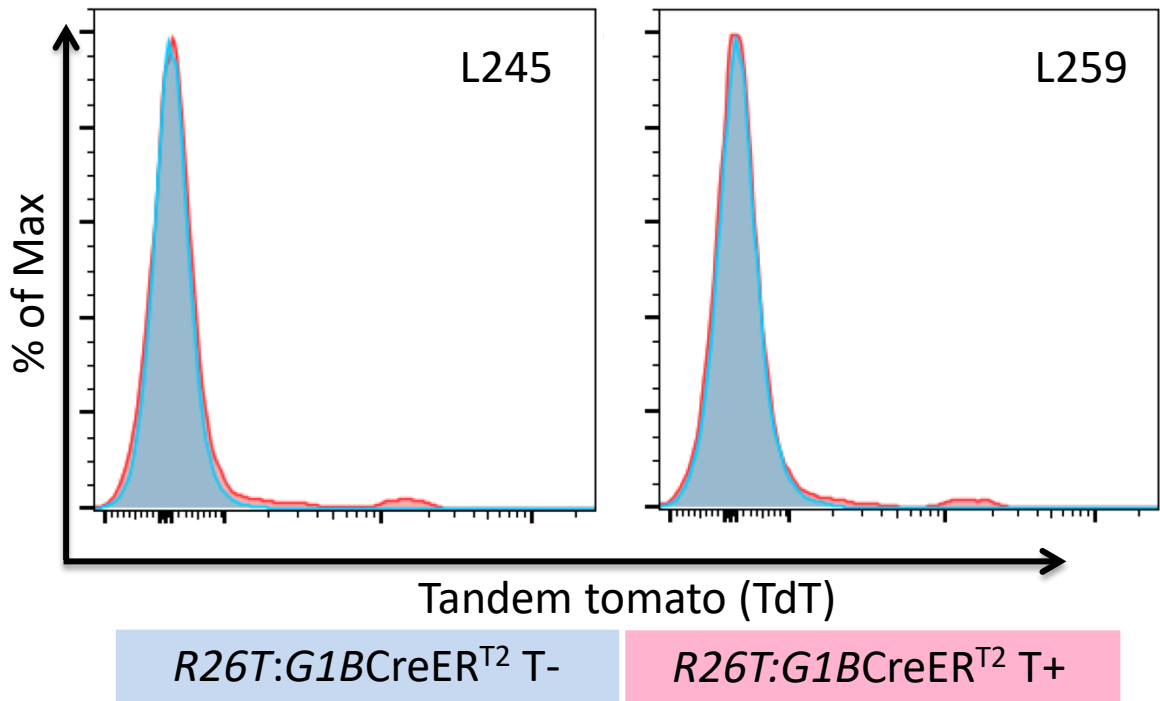

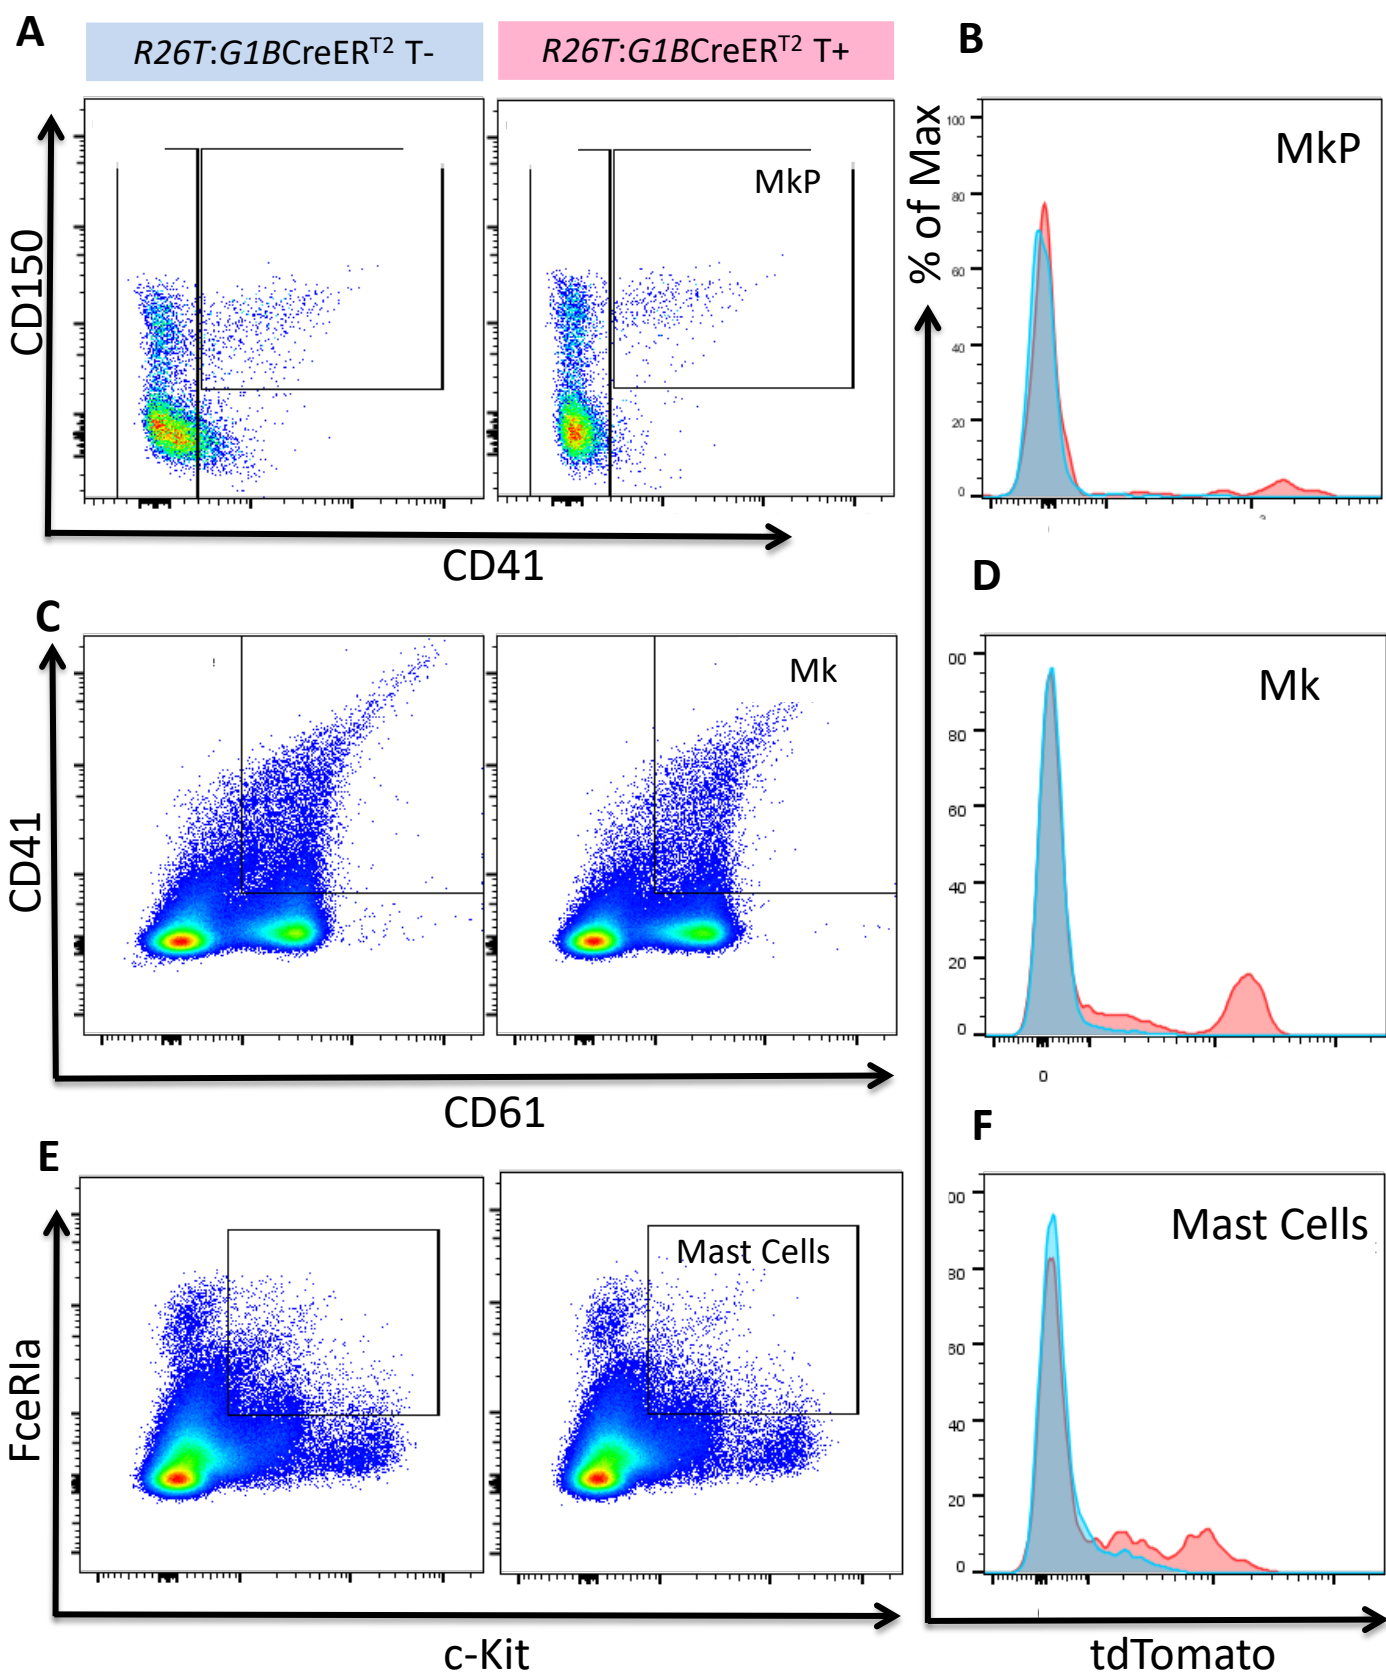

Supplemental Figure 4.



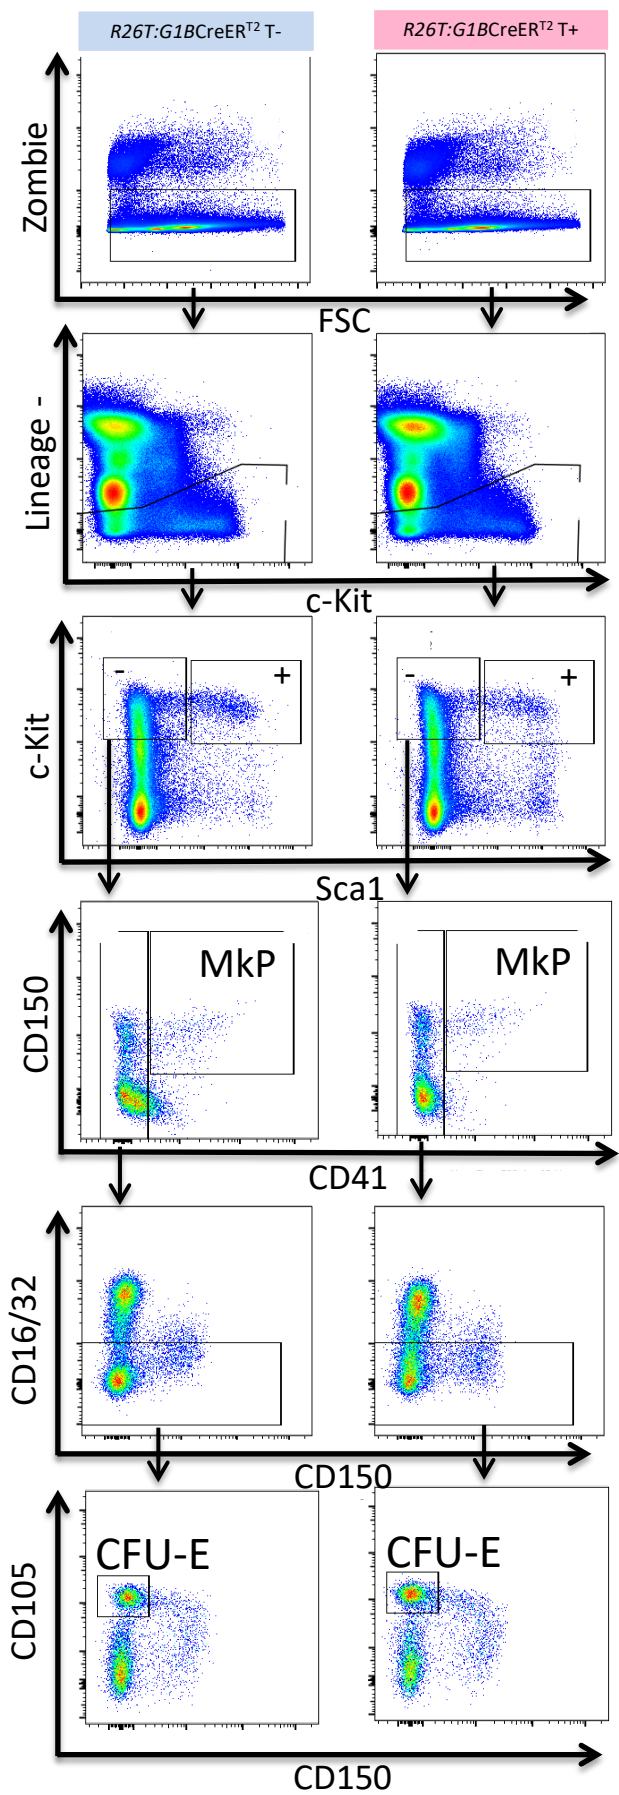

Supplemental Figure 5.

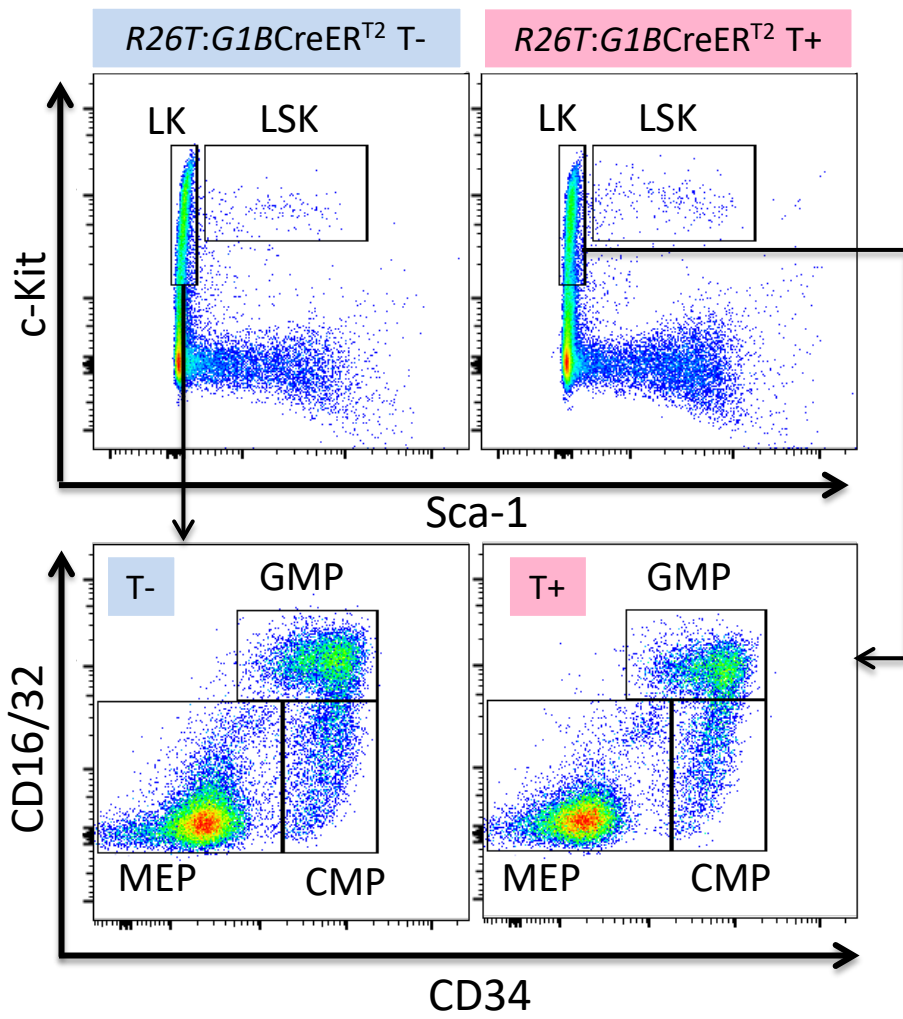

Supplemental Figure 6.

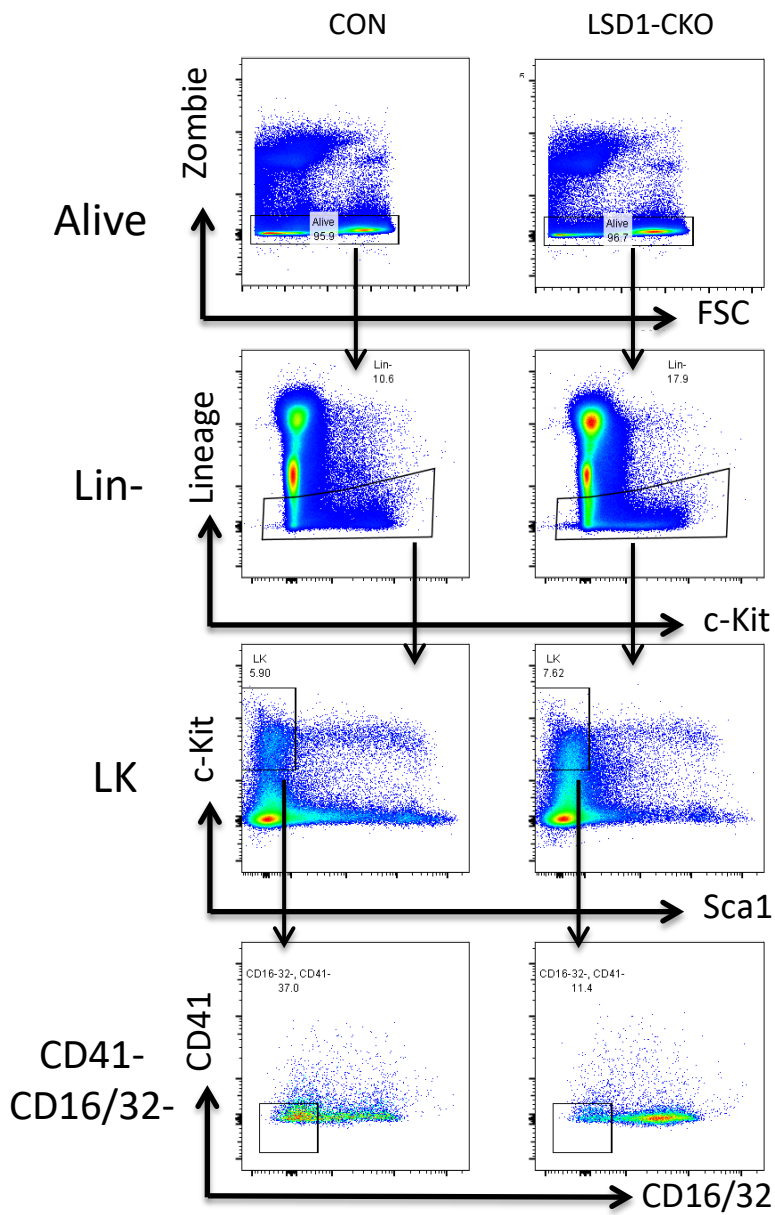

Supplemental Figure 7.

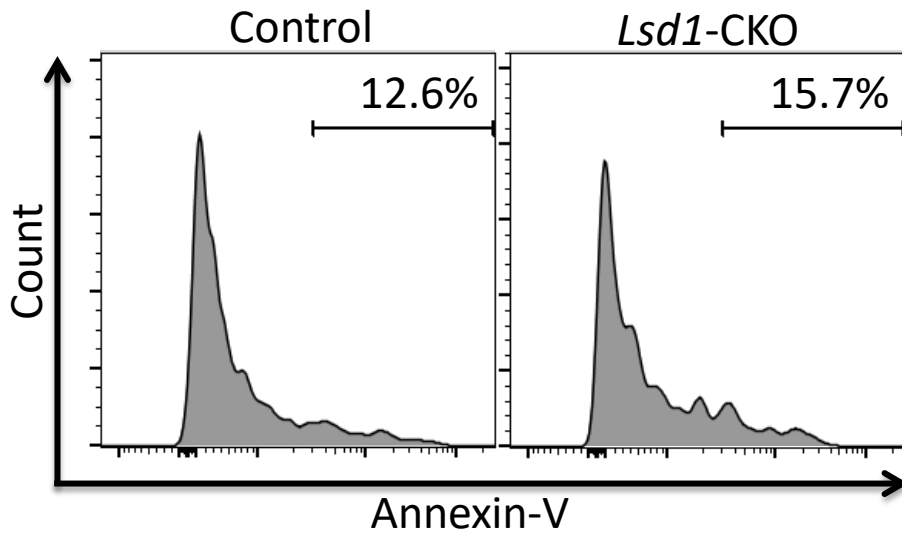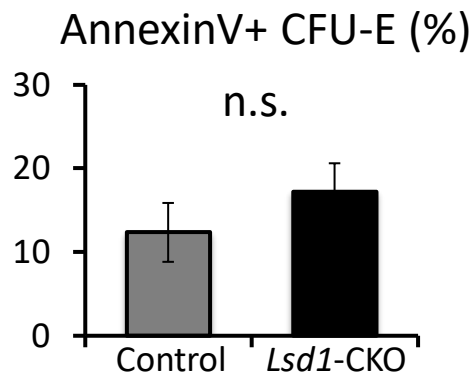

Supplemental Figure 8.

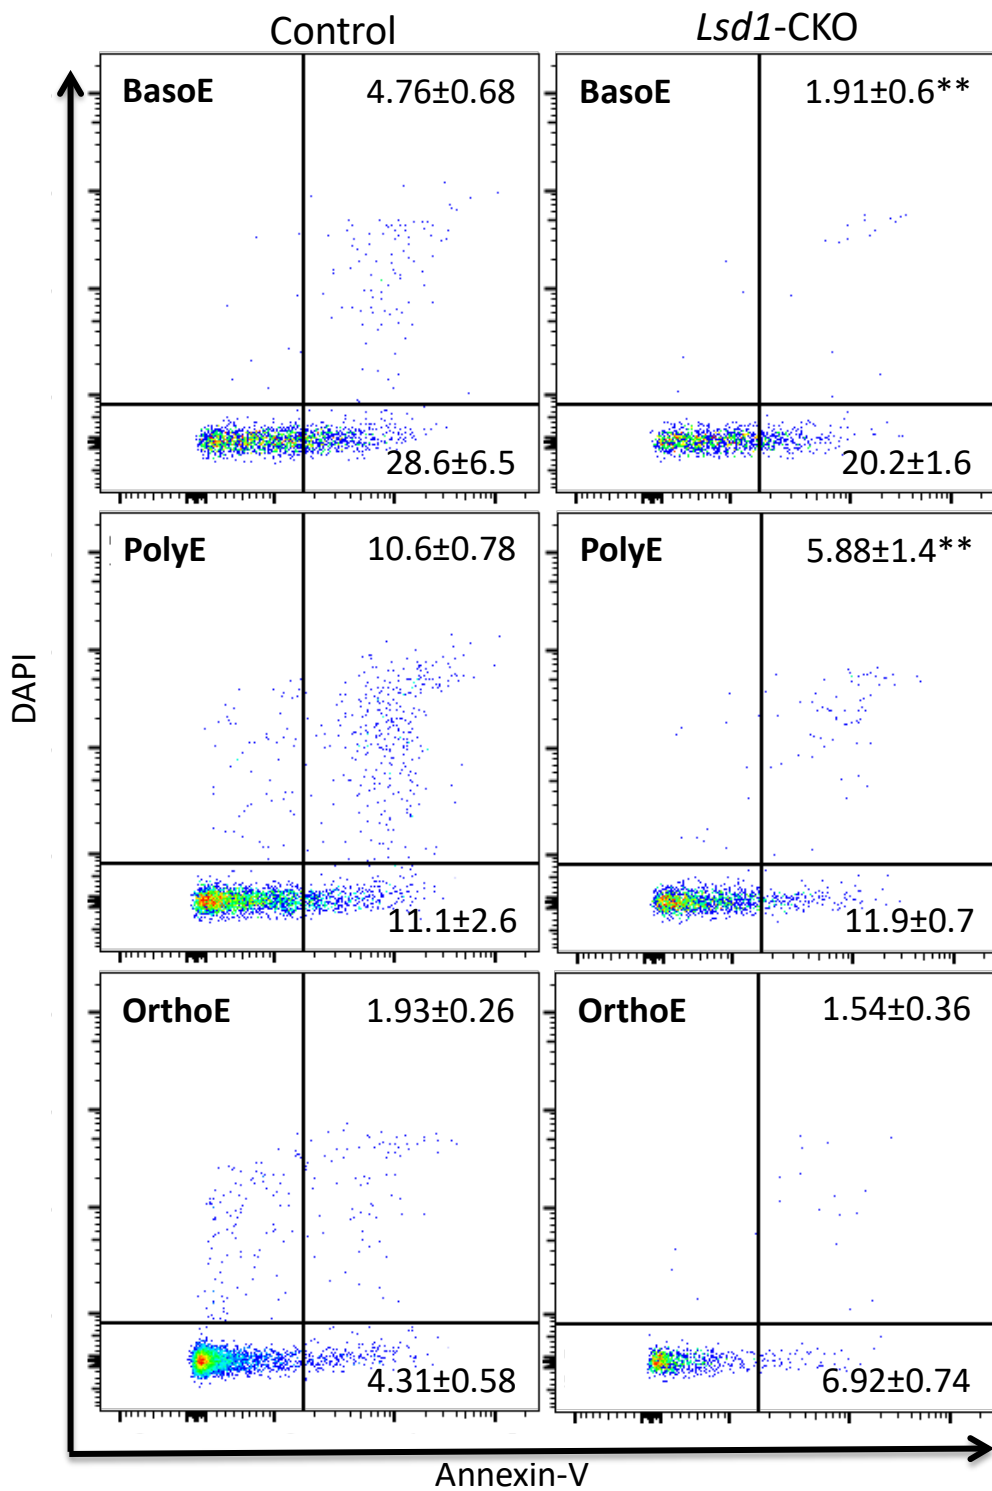

Supplemental Figure 9.

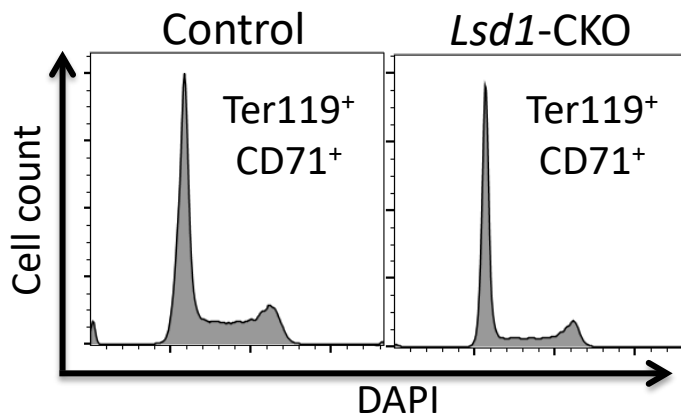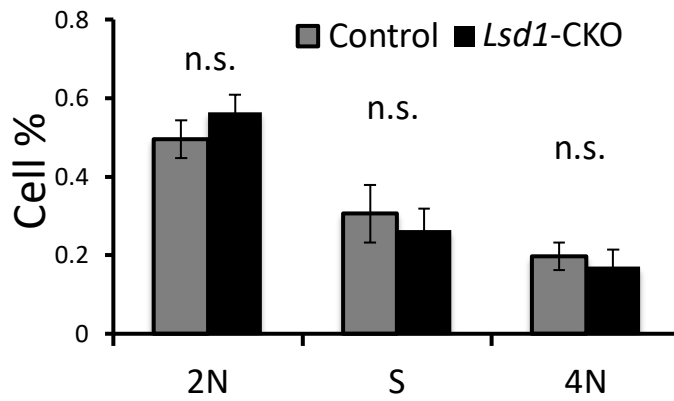

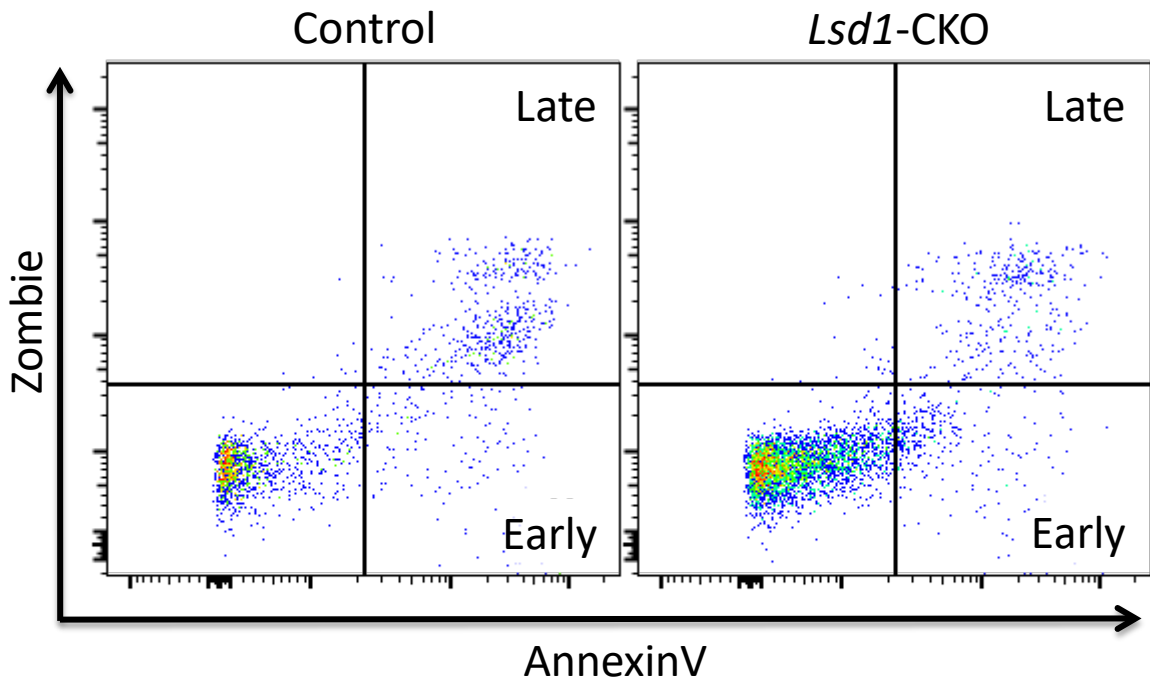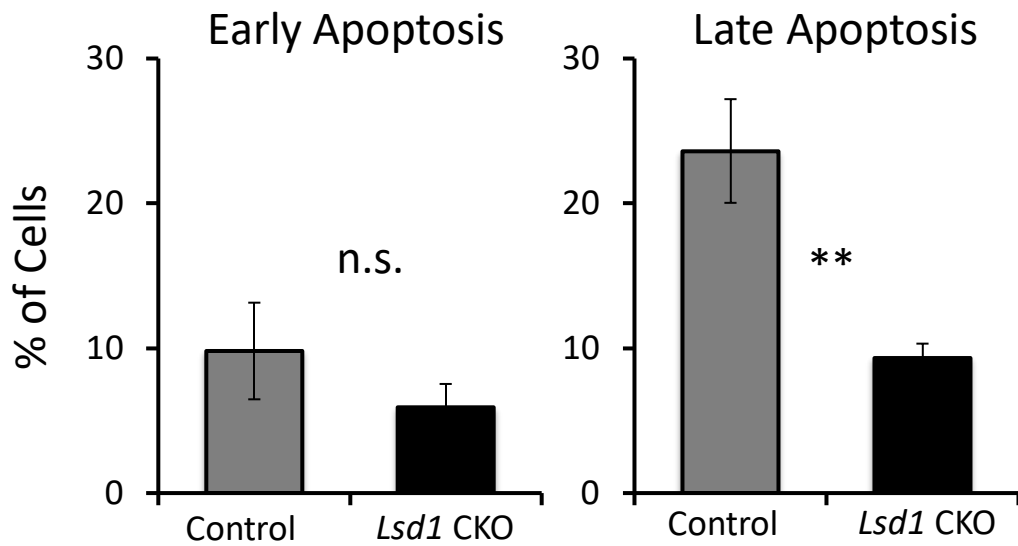

Supplemental Figure 11.

**A**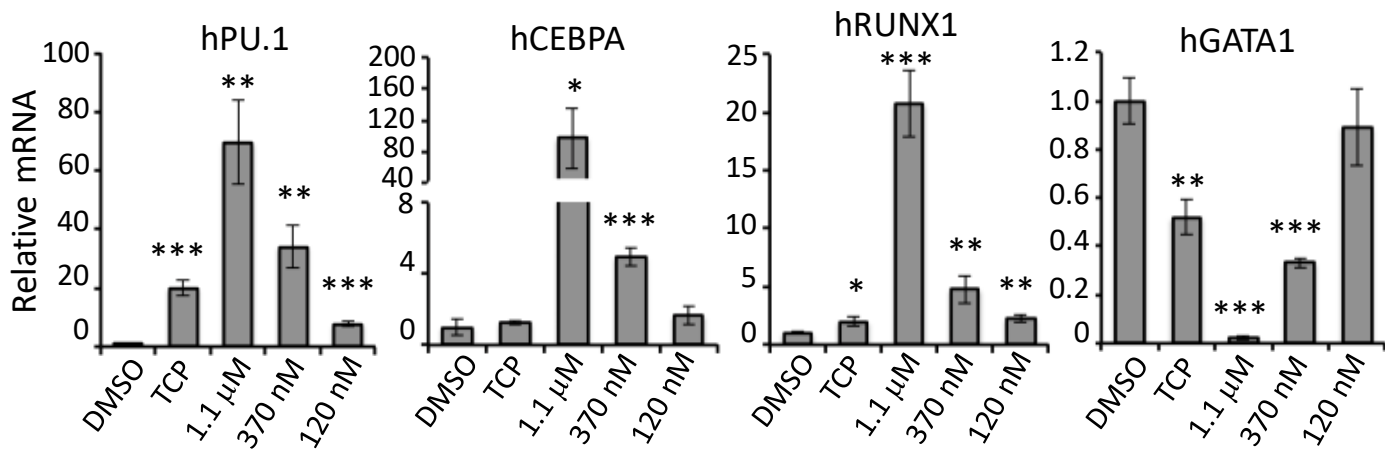**B**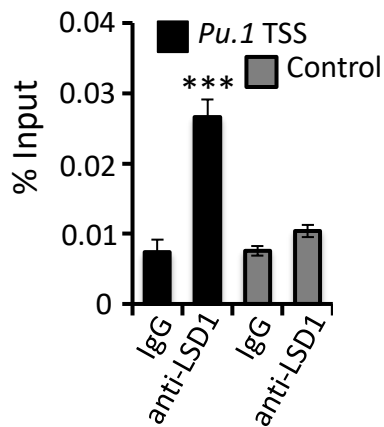



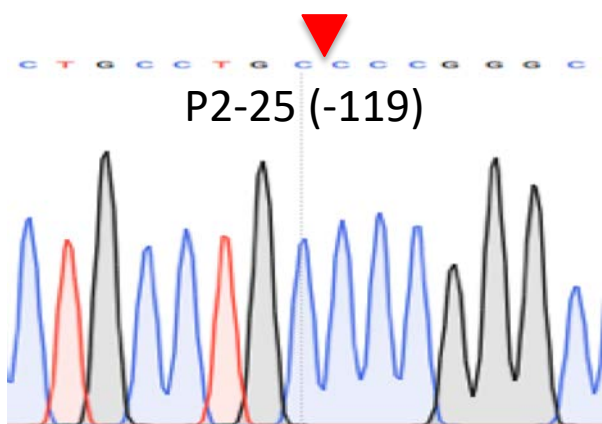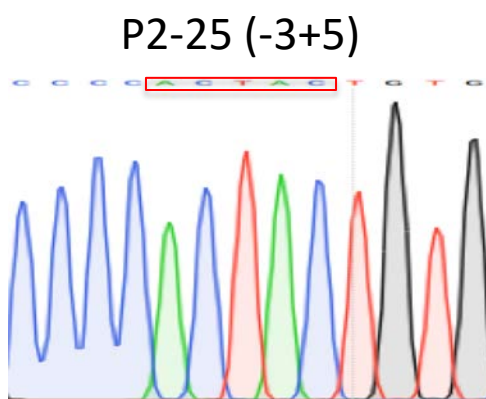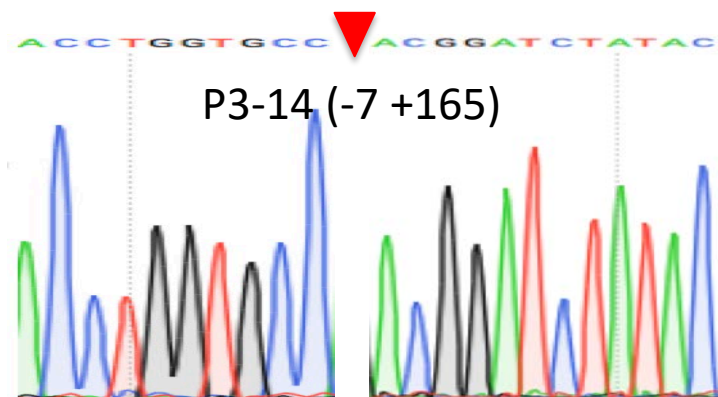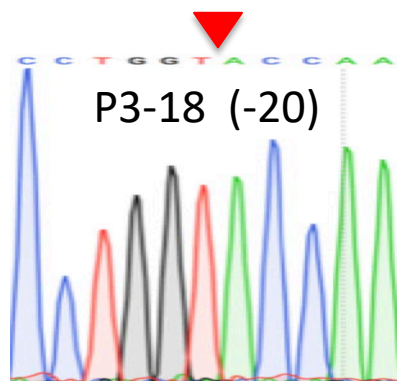

Supplemental Figure 13.

R1-6 (-10)

R1-6 (+1)

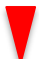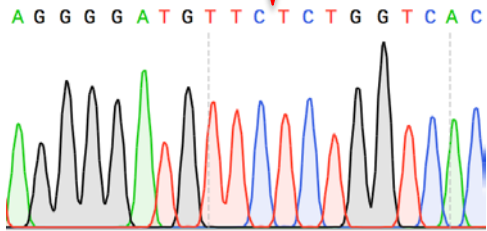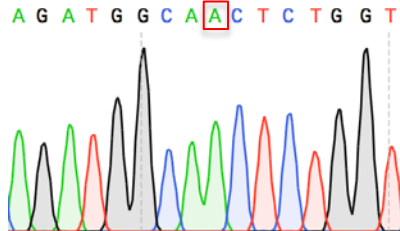

R1-12 (-4)

R1-12 (+1)

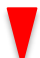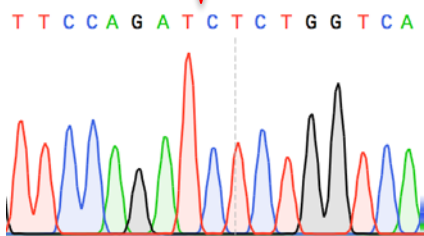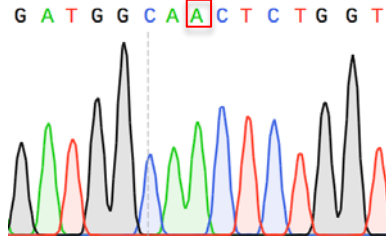

R1-14 (-8)

R1-14 (-17)

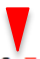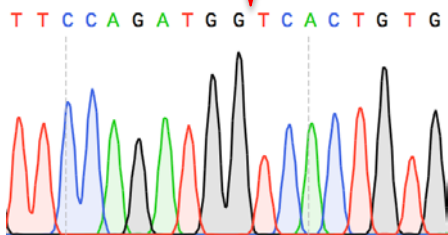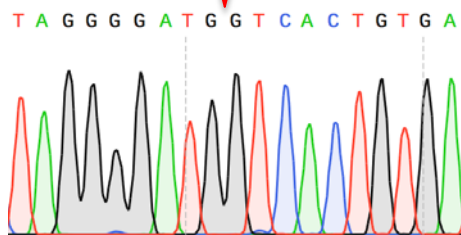

R2-47 (+1)

R2-47 (-2)

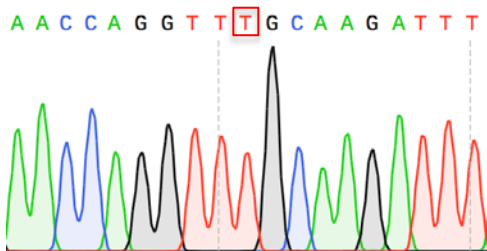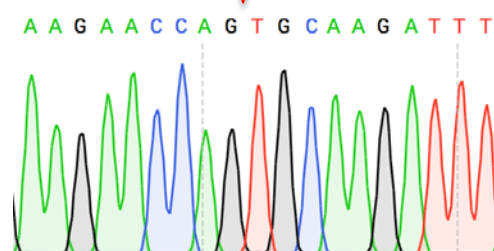

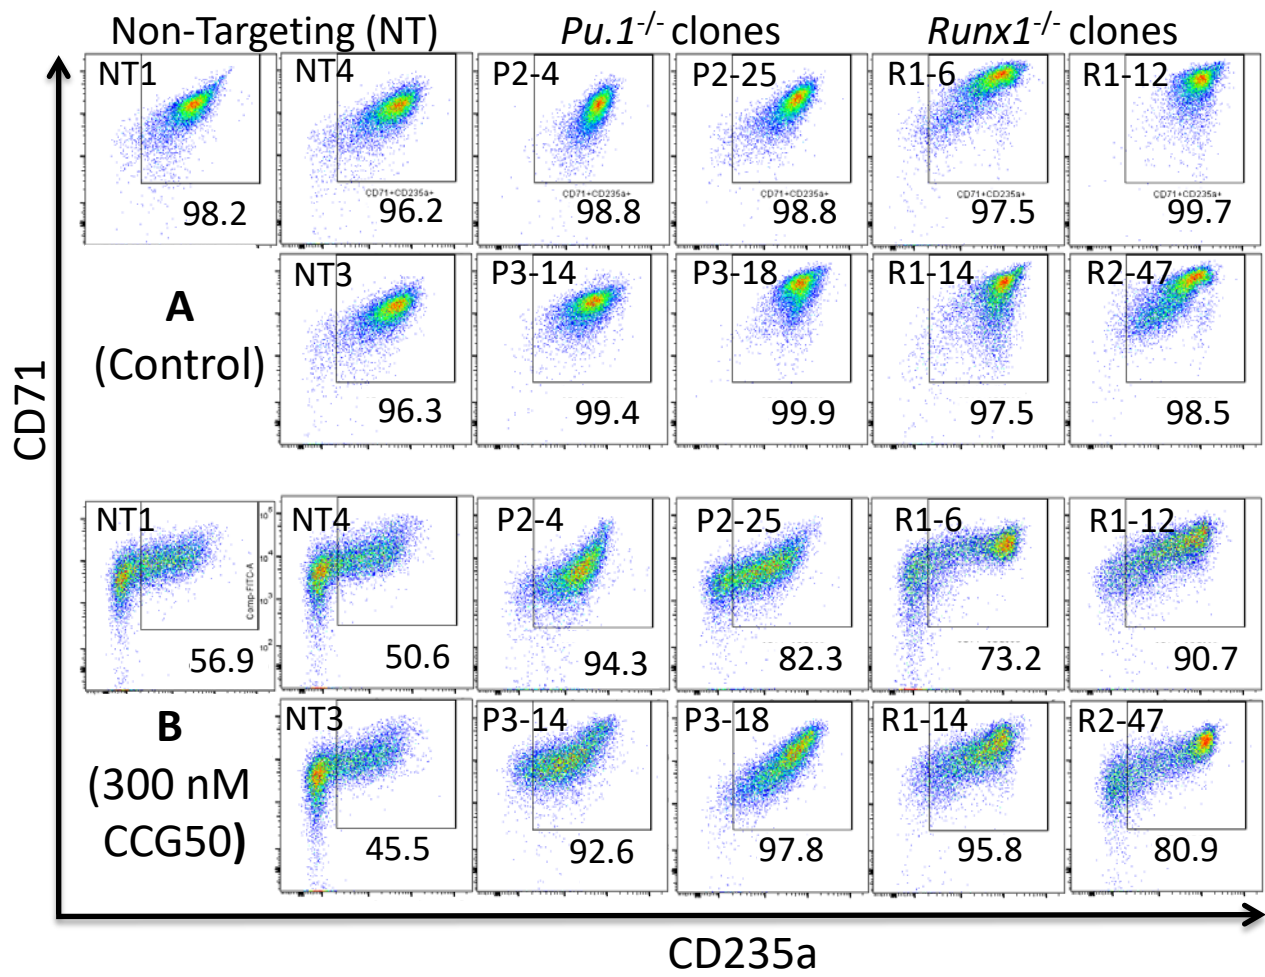

Supplemental Figure 15.

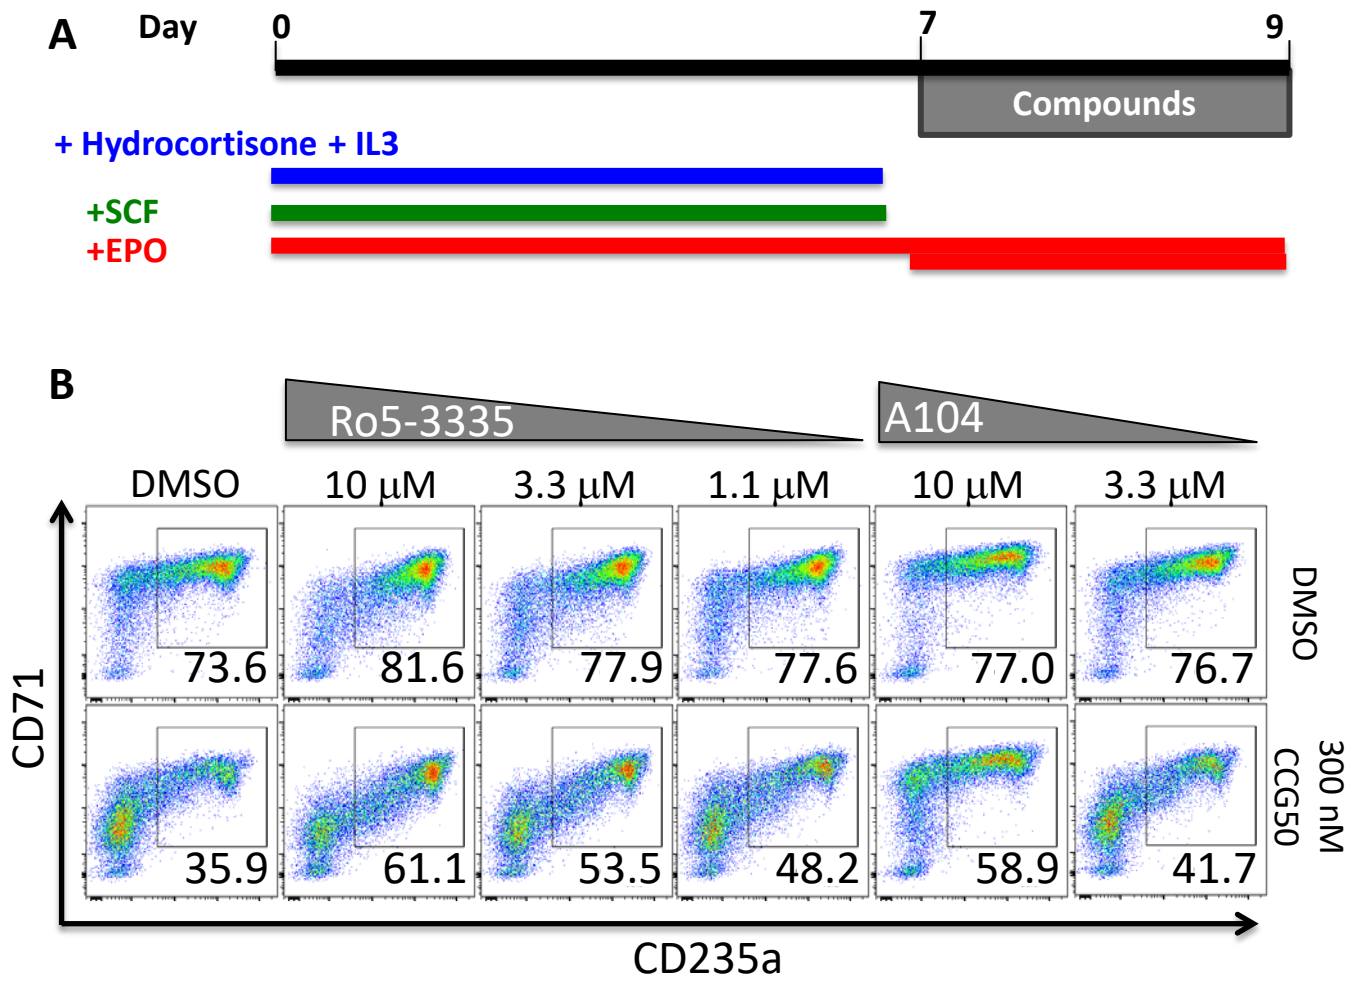

Supplemental Figure 16.

**Supplemental Table 1.** Sequences of all DNA oligonucleotides used in these studies,

| <b>Mouse Genotyping</b>        | <b>Forward 5' to 3'</b>                | <b>Reverse 5' to 3'</b>             |
|--------------------------------|----------------------------------------|-------------------------------------|
| Lsd1 flox                      | AGCTACAGCACCAACACTAAAGAG               | CAGCAGCTCGACAGCTACAGAGTT            |
| CAT                            | CAGTCAGTTGCTCAATGTACC                  | ACTGGTGAAACTCACCCA                  |
| Cre                            | ACG TTCACCGGCATCAACGT                  | CTGCATTACCGGTTCGATGCA               |
| ERT2                           | GACAGGGAGCTGGTTCACAT                   | AGAGACTTCAGGGTTCGCTGGA              |
| R26T                           | CTGTTCTGTACGGCATGG                     | GGCATTAAAGCAGCGTATCC                |
| <b>Real time qPCR</b>          | <b>Forward 5' to 3'</b>                | <b>Reverse 5' to 3'</b>             |
| Human OAZ1                     | GACAGCTTTGCAGTTCTCCTGG                 | TTCGGAGCAAGGCGGCTC                  |
| Human $\gamma$ -globin         | TGGATCCTGAGAACTTCAAGC                  | CACTGGCCACTCCAGTCAC                 |
| Human $\beta$ -globin          | AGGAGAAGTCTGCCGTTACTG                  | CCGAGCACTTTCTTGCCATGA               |
| Human GATA1                    | CACTGAGCTTGCCACATCC                    | ATGGAGCCTCTGGGGATTA                 |
| Human KLF1                     | GGGAGCCTCTTACGGAAAAT                   | TGCACGACAGTTTGGACATC                |
| Human TAL1                     | GTACCCCGTAGCGGAAA                      | AGGTGTCTACGCGGTTGC                  |
| Human PU.1                     | GACACGGATCTATACCAACGCC                 | CCGTGAAGTTGTTCTCGGCGAA              |
| Human RUNX1                    | CCACCTACCACAGAGCCATCAA                 | TTCACTGAGCCGCTCGGAAAAG              |
| Human CEBPA                    | GCAAATCGTGCCTTGTTCAT                   | CTCATGGGGGTCTGCTGTAG                |
| Mouse RUNX1                    | CACCGTCTTTACAAATCCGCCAC                | CGCTCGGAAAAGGACAAACTCC              |
| Mouse PU.1                     | GAGGTGTCTGATGGAGAAGCTG                 | ACCCACCAGATGCTGTCCTTCA              |
| Mouse LSD1                     | CGATACTGTGCTTGTCCACCGA                 | CCAAGCCAGAAACACCTGAACC              |
| Mouse GATA1                    | ACGACCACTACAACACTCTGGC                 | TTGCGGTTCTCGTCTGGATTC               |
| Mouse 18S rRNA                 | CTCAACACGGGAAACCTCAC                   | CGCTCCACCAACTAAGAACG                |
| Lsd1 deletion P1               | TCAGGTGTTTCTGGCTTGG                    | CTCTTACCCTGGCTTCCAGA                |
| Lsd1 deletion P2               | TAGTTAGGCAGGCAGCAGGT                   | GCAGCAGACATTGCTCAAAC                |
| <b>ChIP assay</b>              | <b>Forward 5' to 3'</b>                | <b>Reverse 5' to 3'</b>             |
| huPu.1 TSS                     | TCTCTTGCGCTACATACAGGAA                 | ATCCCTCTCAGTCCCAGCTT                |
| huPu.1 -14kb                   | AATGGGCTGTTGGCGTTTTG                   | CTGAGAAAACAGGAAGCGCC                |
| huPu.1 +27kb                   | AAACCTCAGGGAAGGCTGAT                   | ACCAGGGATCTTACGCAGTC                |
| <b>Gata1 BAC recombination</b> | <b>Forward 5' to 3'</b>                | <b>Reverse 5' to 3'</b>             |
| 5' Homologous region           | ATCGGAATTCCGCGGAA<br>GTTGGGGAGCACAGAAG | ATCGGAATTCCGGGAACACT<br>GGGGTTGAA   |
| 3' Homologous region           | ATCGGAATTCTCACAGG<br>TTCAACCCAGT       | ATCGGGTACCTGAGCAGTG<br>GATACACCTGAA |
| Screening Primer1              | TGCTCCTGCCGAGAAAGTAT<br>(Neo F)        | CTATCAGGCCAACCTGTGGT (Gata1 R)      |
| Screening Primer2              | GAAGAGGCACTGGGAGTCAG (Gata1 F)         | ATTCTCCCACCGTCAGTACG (CreERT2 R)    |
| <b>Guide RNA</b>               | <b>Sequence 5' to 3'</b>               |                                     |
| Non-Targeting-1                | GTTCATTTCCAAGTCCGCTG                   |                                     |
| Non-Targeting-3                | GTATTACTGATATTGGTGGG                   |                                     |
| Non-Targeting-4                | TCATGCTTGCTTGGGCAAAA                   |                                     |
| SgPU.1-2                       | GGGTACTGGAGGCACATCCG                   |                                     |
| SgPU.1-3                       | AGACCTGGTGCCCTATGACA                   |                                     |
| SgRUNX1-1                      | GGATGTTCCAGATGGCACTC                   |                                     |
| SgRUNX1-2                      | GGTCATTAAATCTTGCAACC                   |                                     |

**Supplemental Table 2.** List of antibodies and the reagent suppliers used in these studies,

| <b>Human</b>     | <b>Fluorescence</b> | <b>Cat#</b> | <b>Vendor</b>  |
|------------------|---------------------|-------------|----------------|
| CD235a           | APC                 | 551336      | BD Biosciences |
| CD71             | FITC                | 334104      | BioLegend      |
| CD11b            | PE                  | 301305      | BioLegend      |
| <b>Mouse</b>     | <b>Fluorescence</b> | <b>Cat#</b> | <b>Vendor</b>  |
| CD71             | FITC                | 113806      | BioLegend      |
| Ter119           | APC                 | 116212      | BioLegend      |
| CD44             | APC-Cy7             | 103028      | BioLegend      |
| B220             | FITC                | 103206      | BioLegend      |
| Gr1              | FITC                | 108406      | BioLegend      |
| CD3e             | FITC                | 100306      | BioLegend      |
| CD11b            | FITC                | 101205      | BioLegend      |
| CD150            | APC                 | 115910      | BioLegend      |
| CD41             | Alexa Fluor 700     | 133925      | BioLegend      |
| CD41             | FITC                | 133904      | BioLegend      |
| CD61             | APC                 | 104315      | BioLegend      |
| FceRIa           | FITC                | 134305      | BioLegend      |
| c-Kit            | APC                 | 105812      | BioLegend      |
| B220             | Biotin              | 13-0452-85  | ThermoFisher   |
| CD2              | Biotin              | 100103      | BioLegend      |
| CD3              | Biotin              | 100304      | BioLegend      |
| CD5              | Biotin              | 100604      | BioLegend      |
| CD8a             | Biotin              | 100704      | BioLegend      |
| GR1              | Biotin              | 13-5931-85  | ThermoFisher   |
| TER119           | Biotin              | 116204      | BioLegend      |
| StAV             | BV650               | 405232      | BioLegend      |
| c-Kit            | APC-Cy7             | 105825      | BioLegend      |
| Sca1             | BV421               | 108128      | BioLegend      |
| CD16/32          | BV605               | 563006      | BD Biosciences |
| CD105            | PE-Cy7              | 120410      | BioLegend      |
| Sca1             | APC                 | 108111      | BioLegend      |
| CD16/32          | PE-Cy7              | 101317      | BioLegend      |
| CD34             | FITC                | 553733      | BD Biosciences |
| Ter119           | eF450               | 48-5921-82  | ThermoFisher   |
| Gr1              | eF450               | 48-5931-80  | ThermoFisher   |
| B220             | eF450               | 48-0452-82  | ThermoFisher   |
| CD3e             | eF450               | 48-0032-82  | ThermoFisher   |
| CD11b            | eF450               | 48-0112-80  | ThermoFisher   |
| CD41             | eF450               | 48-0411-82  | ThermoFisher   |
| <b>Live/Dead</b> | <b>Fluorescence</b> | <b>Cat#</b> | <b>Vendor</b>  |
| Annexin-V        | PE                  | 556421      | BD Biosciences |
| DAPI             | Pacific Blue        | 422801      | BioLegend      |
| Zombie Aqua      | BV510               | 423101      | BioLegend      |
